# Supplementary figures and images for: The Ret receptor regulates sensory neuron dendrite growth and integrin mediated adhesion
Source: eLife journal article supplement (doi:10.7554/elife.05491), 2015-03-12

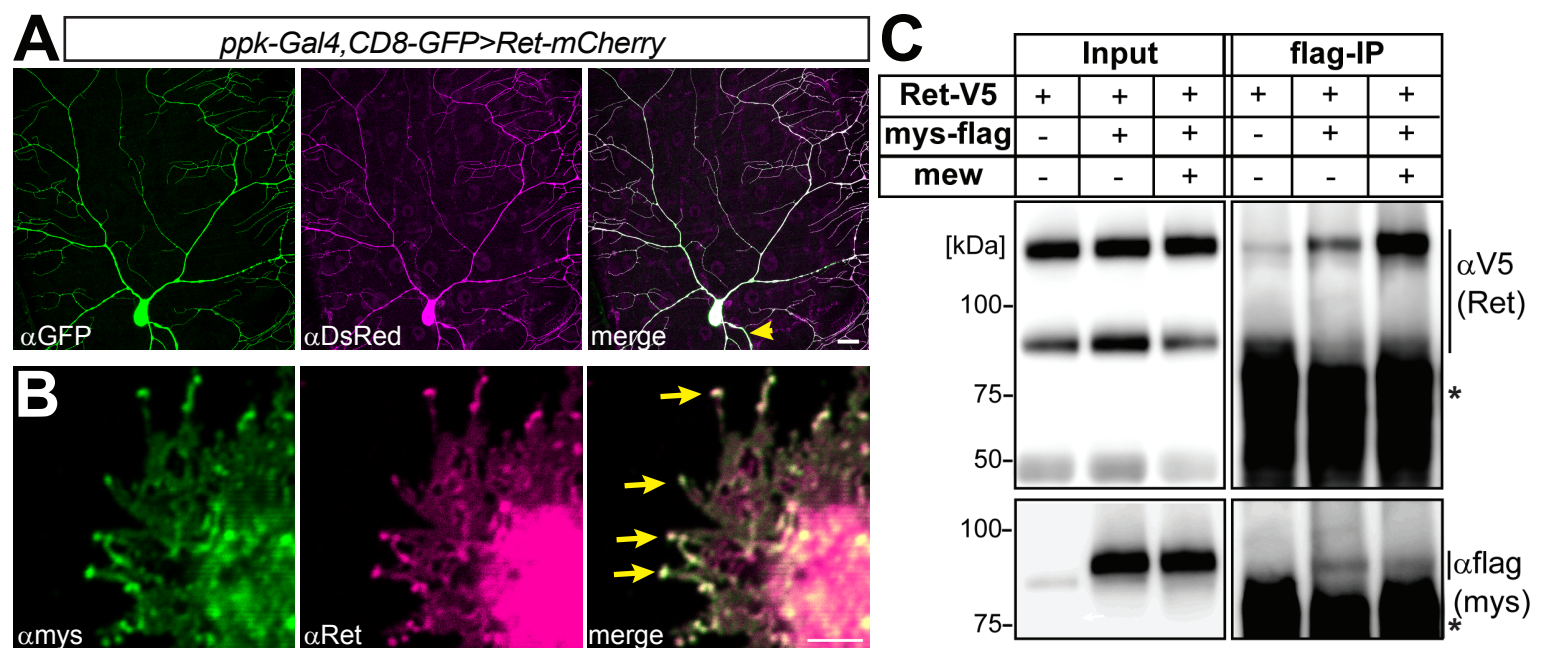

Figure 4-figure supplement 1, Soba *et al.*

Supplement: supp [file elife-05491-supp-v1.zip]

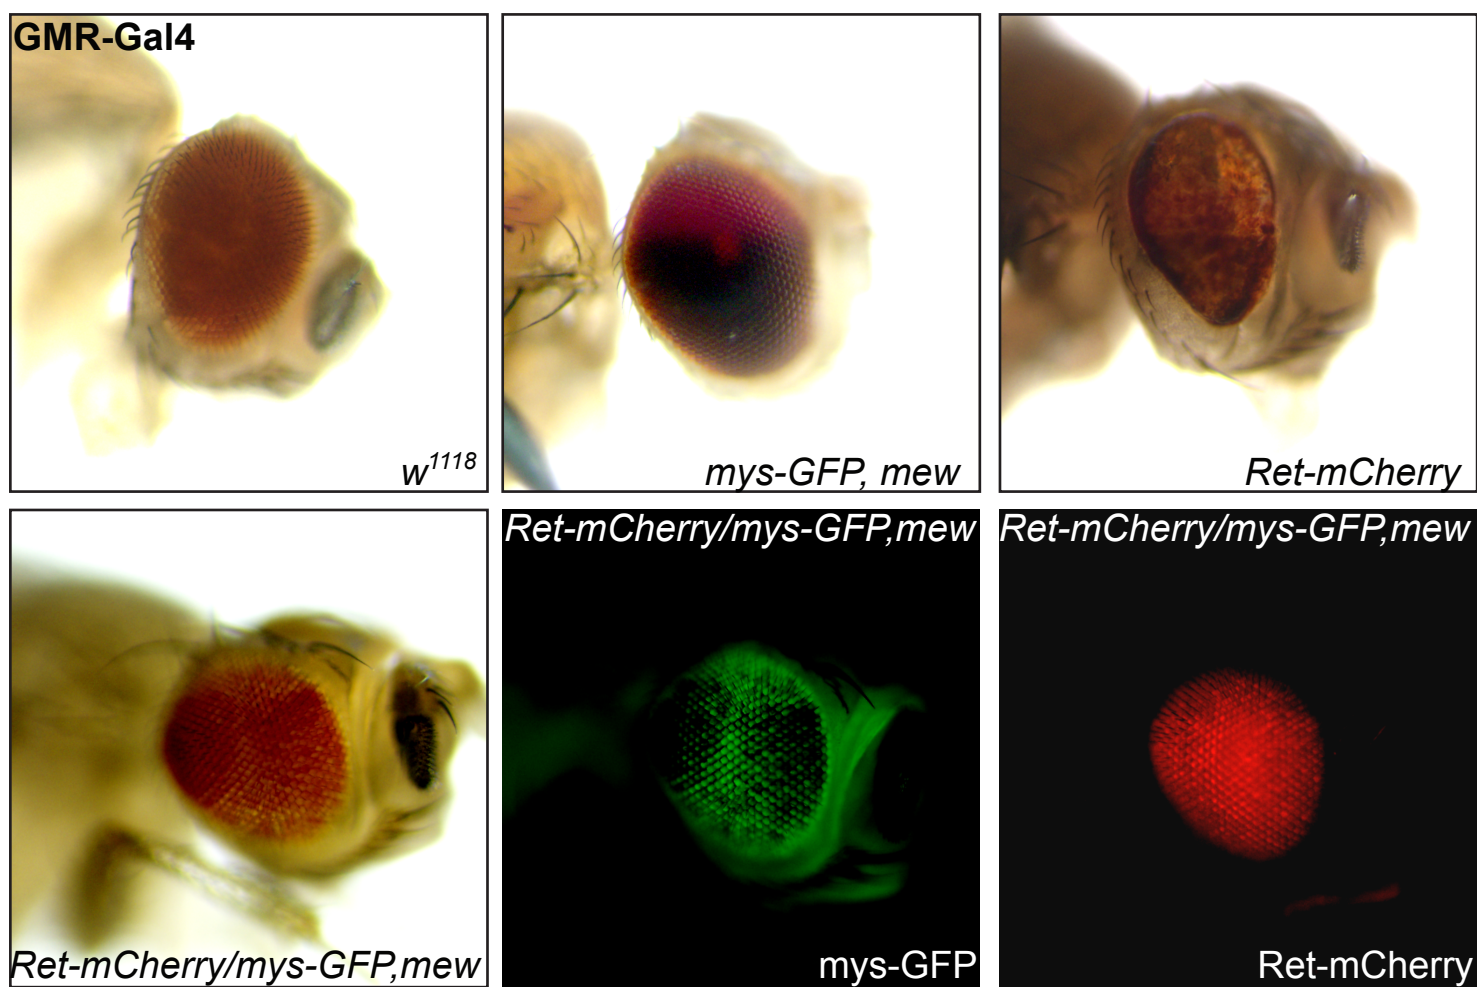

Figure 5-figure supplement 1, Soba *et al.*

Supplement: supp [file elife-05491-supp-v1.zip]

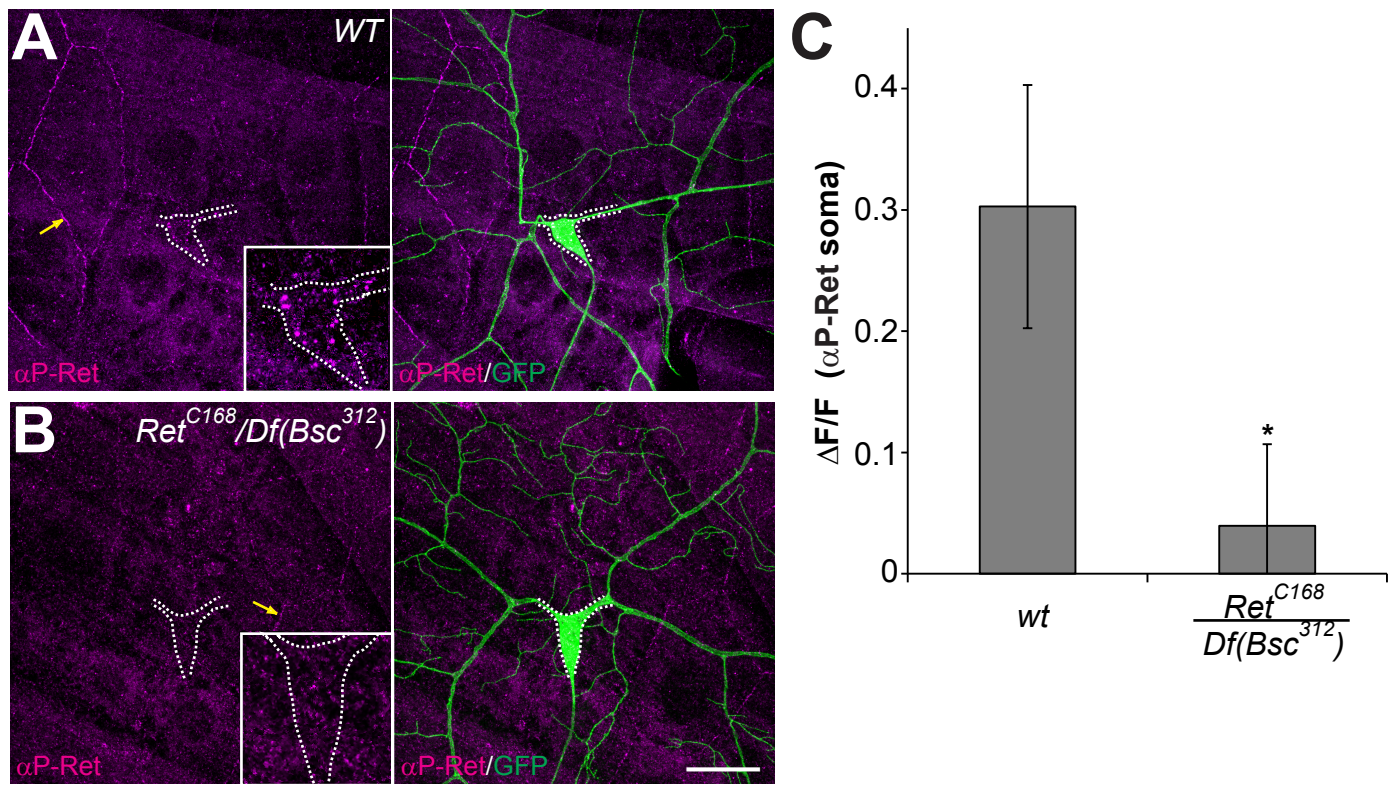

Figure 1-figure supplement 2, Soba *et al.*

Supplement: supp [file elife-05491-supp-v1.zip]

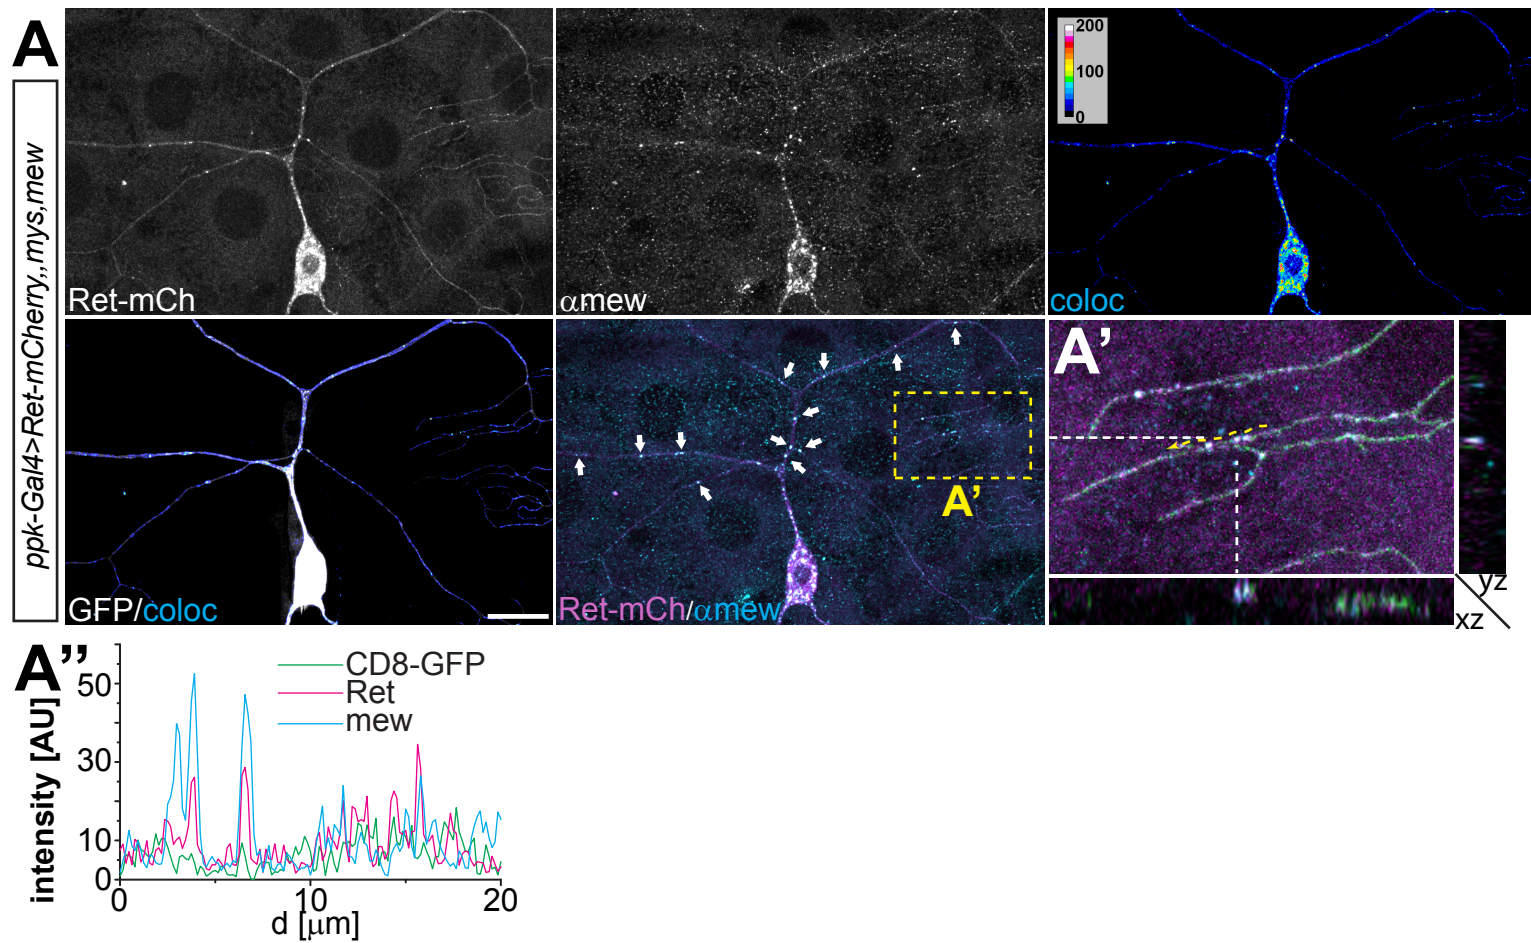

Supplement: supp [file elife-05491-supp-v1.zip]

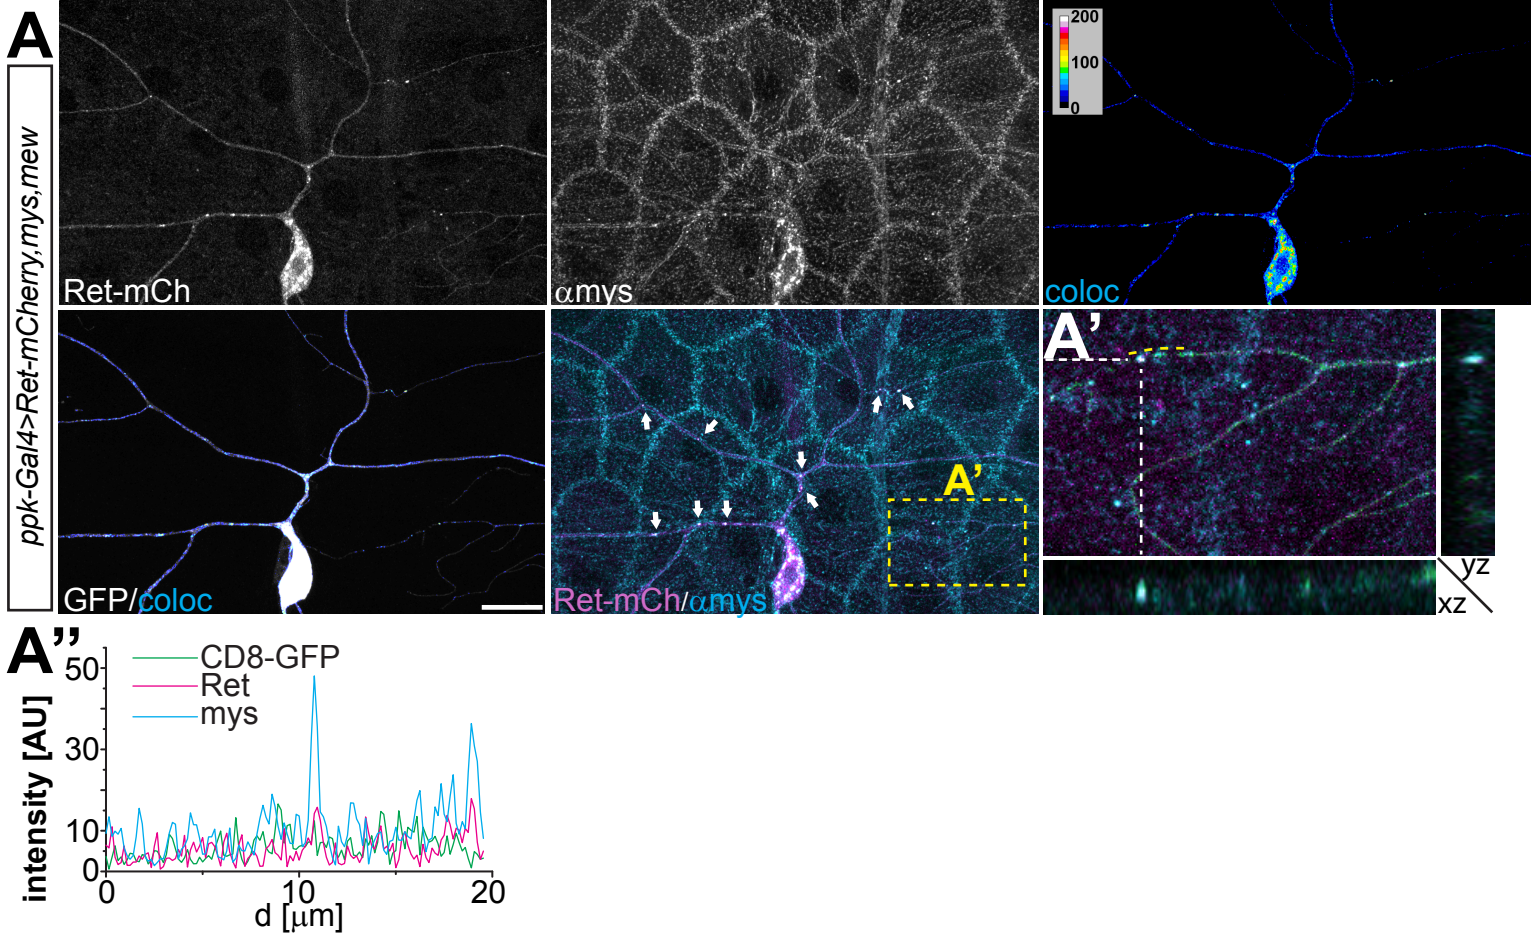

Supplement: supp [file elife-05491-supp-v1.zip]

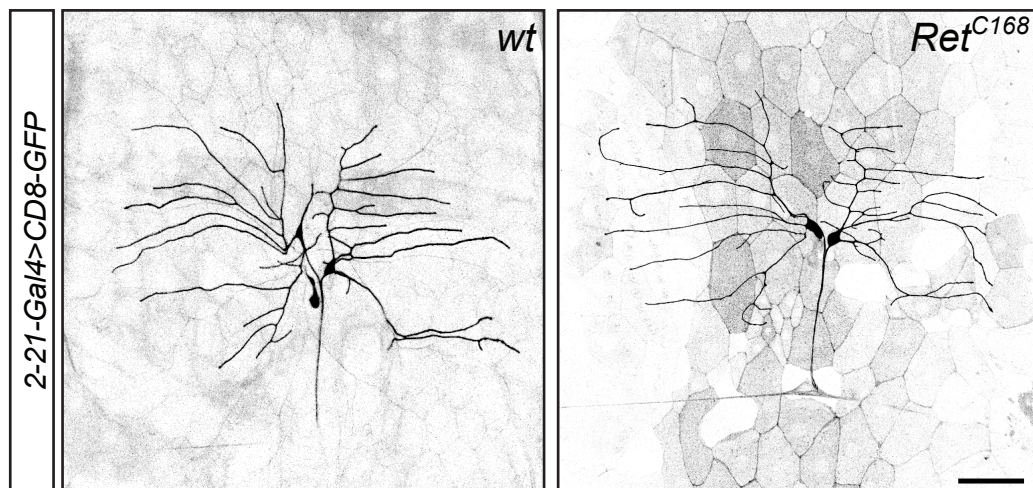

Figure 1-figure supplement 1, Soba *et al.*

Supplement: supp [file elife-05491-supp-v1.zip]
